# Supplementary material
Source: publisher site journal article supplement (http://www.kjim.org/upload/media/kjim-2022-340-Supplementary-Table-1.pdf)
Supplement: Supplementary file 1 [file kjim-2022-340-Supplementary-Table-1.pdf]

**Supplementary Table 1. Sensitivity analysis using the initial dataset without limitations in the follow-up period for the subgroups of users and nonusers of acid suppressants**

|                         | Acid suppressant user (n = 5,801) |           |         | Acid suppressant nonuser (n = 9,741) |           |         |
|-------------------------|-----------------------------------|-----------|---------|--------------------------------------|-----------|---------|
|                         | HR                                | 95% CI    | p value | HR                                   | 95% CI    | p value |
| Male                    | 1.05                              | 0.71–1.50 | 0.825   | 0.79                                 | 0.48–1.30 | 0.347   |
| Age                     | 0.97                              | 0.95–0.98 | < 0.001 | 0.98                                 | 0.95–1.00 | 0.027   |
| Anticoagulant           | 4.32                              | 2.90–6.40 | < 0.001 | 2.11                                 | 1.30–3.50 | 0.005   |
| Aspirin <sup>a)</sup>   |                                   |           |         |                                      |           |         |
| 4–12 weeks              | 0.59                              | 0.22–1.60 | 0.292   | 0.52                                 | 0.12–2.20 | 0.383   |
| ≥ 12 weeks              | 0.23                              | 0.10–0.54 | 0.001   | 0.33                                 | 0.09–1.20 | 0.098   |
| CCI score <sup>b)</sup> |                                   |           |         |                                      |           |         |
| 1                       | 3.40                              | 1.90–6.00 | < 0.001 | 0.98                                 | 0.49–1.90 | 0.950   |
| ≥ 2                     | 4.60                              | 2.80–7.70 | < 0.001 | 1.91                                 | 1.10–3.30 | 0.018   |
| Eupatilin use           | 0.62                              | 0.36–1.10 | 0.102   | 0.93                                 | 0.37–2.30 | 0.870   |
| Rebamipide use          | 1.45                              | 0.99–2.10 | 0.057   | 0.88                                 | 0.44–1.80 | 0.716   |
| Other MPA use           | 2.27                              | 1.50–3.50 | < 0.001 | 1.13                                 | 0.35–3.60 | 0.837   |

Acid suppressant, histamine-2 receptor antagonist or proton pump inhibitor; HR, hazard ratio; CI, confidence interval; CCI, Charlson comorbidity index; MPA, mucoprotective agent.

<sup>a)</sup>The reference category with the duration of aspirin use lasting less than 4 weeks.

<sup>b)</sup>CCI score of 0 was the reference category.
